# Supplementary material
Source: publisher figshare collection journal article supplement (https://tandf.figshare.com/articles/dataset/_/7028330)
Supplement: Supplementary file 1 [file 2]

Archive with 2 entries (2 files):
- tost_a_1480068_sm9773.pdf
- tost_a_1480068_sm4684.pdf
