# Supplementary material
Source: publisher figshare collection journal article supplement (https://tandf.figshare.com/articles/dataset/_/7028330)
Supplement: Supplementary file 1 [file 2 › tost_a_1480068_sm9773.pdf]

## Supplementary Information

### Seabird breeding populations decrease along the arid coastline of South Africa's Northern Cape province

Robert JM Crawford, Bruce M Dyer, Louise Geldenhuys, W Herman Oosthuizen and Azwianewi B Makhado  
Ostrich 2018, 89(4): 299–305. <https://doi.org/10.2989/00306525.2018.1480068>

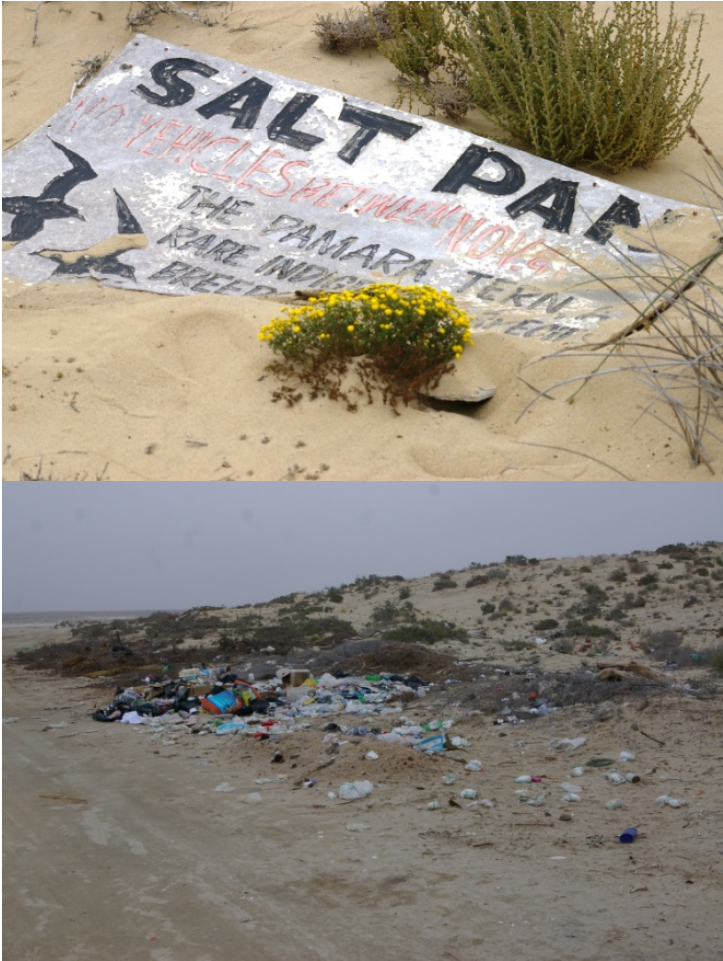

**Figure S1:** Photographs taken in 2011 of Port Nolloth Pan showing the derelict Damara Tern sign prohibiting vehicular access (top) and the use of the pan's perimeter as a waste dump (bottom) (photographs: BM Dyer)

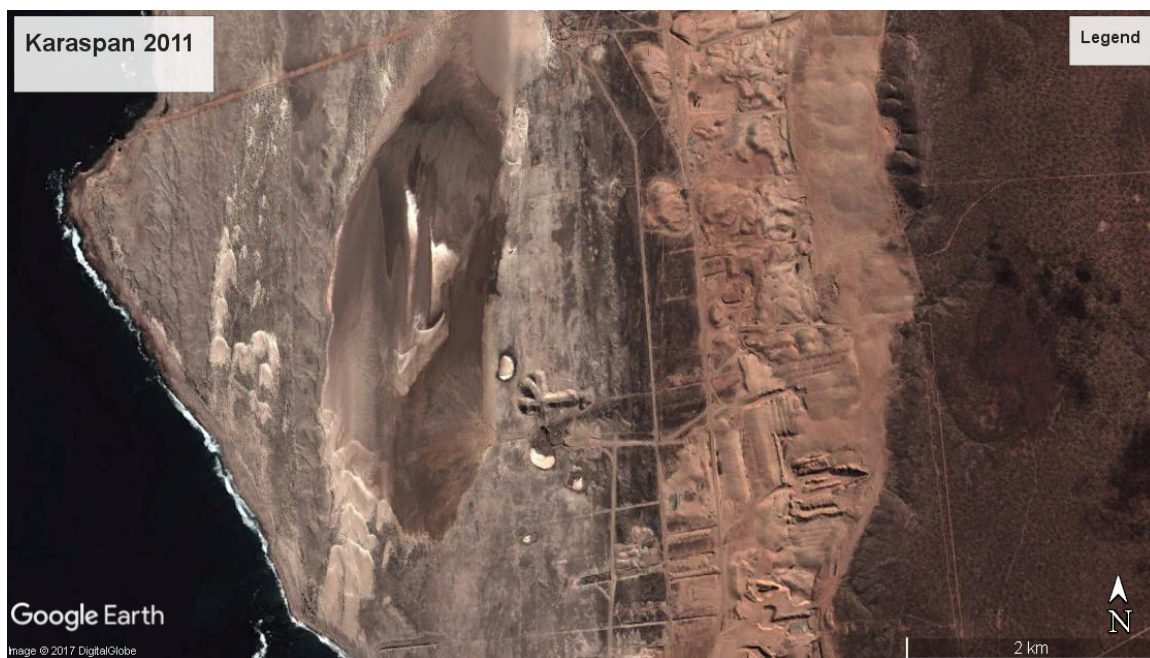

**Figure S2:** Google Earth image of Karas Pan taken in 2011 showing seepage into the pan from the diamond mine to the east (right) of the pan
